# Supplementary figures and images for: PPIP5K2 Facilitates Proliferation and Metastasis of Non-Small Lung Cancer (NSCLC) through AKT Signaling Pathway
Source: MDPI journal article supplement (doi:10.3390/cancers16030590), 2024-01-30

Fig.2A

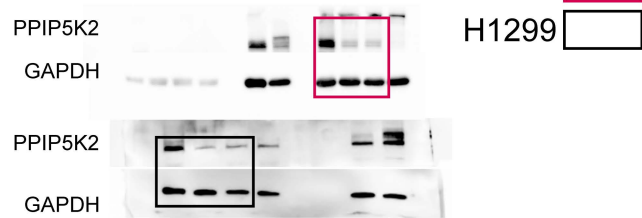A549 ☐H1299 ☐

Fig.2B

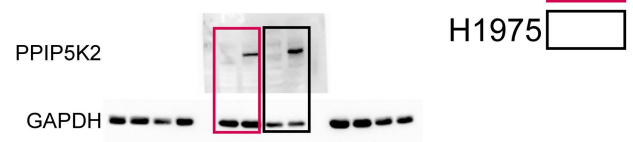H1703 ☐H1975 ☐

Fig.4I

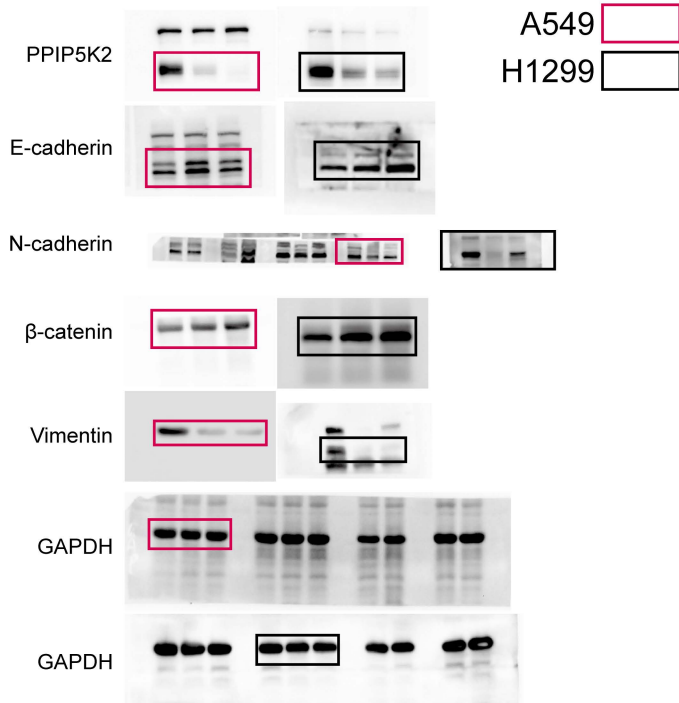A549 ☐H1299 ☐

Fig.4J

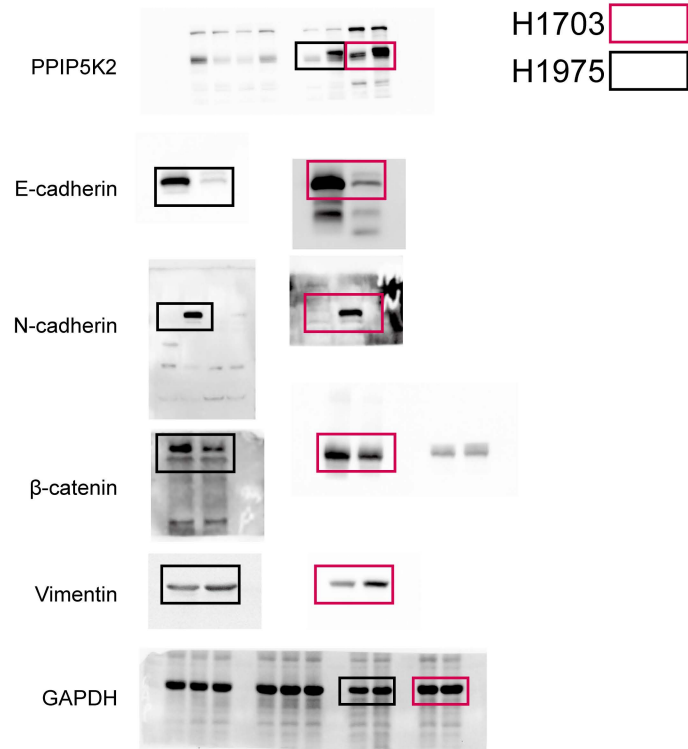H1703 ☐H1975 ☐

Fig.5A

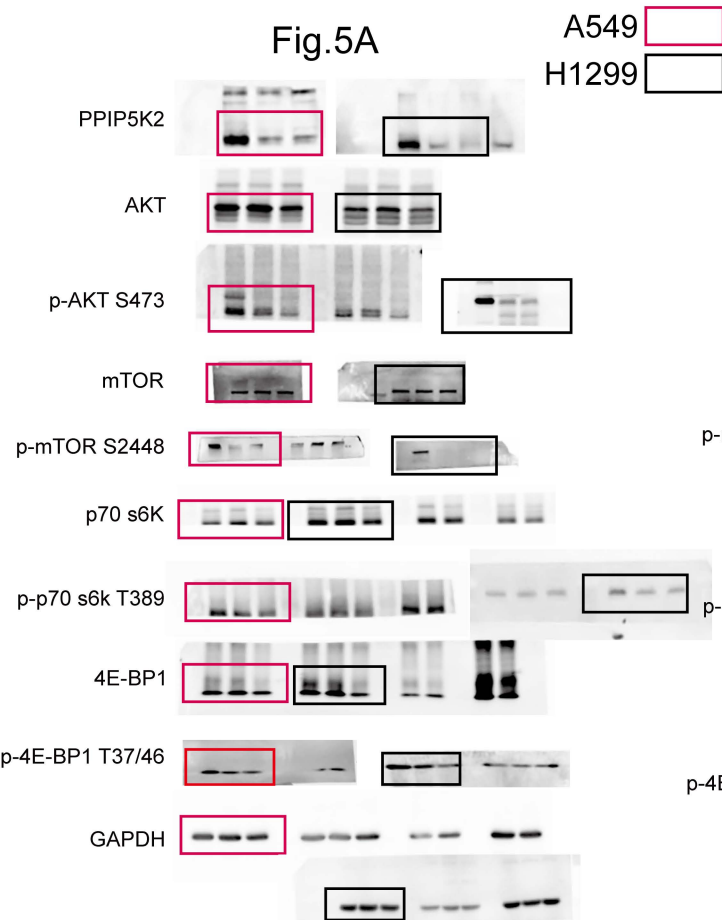A549 ☐H1299 ☐

Fig.5B

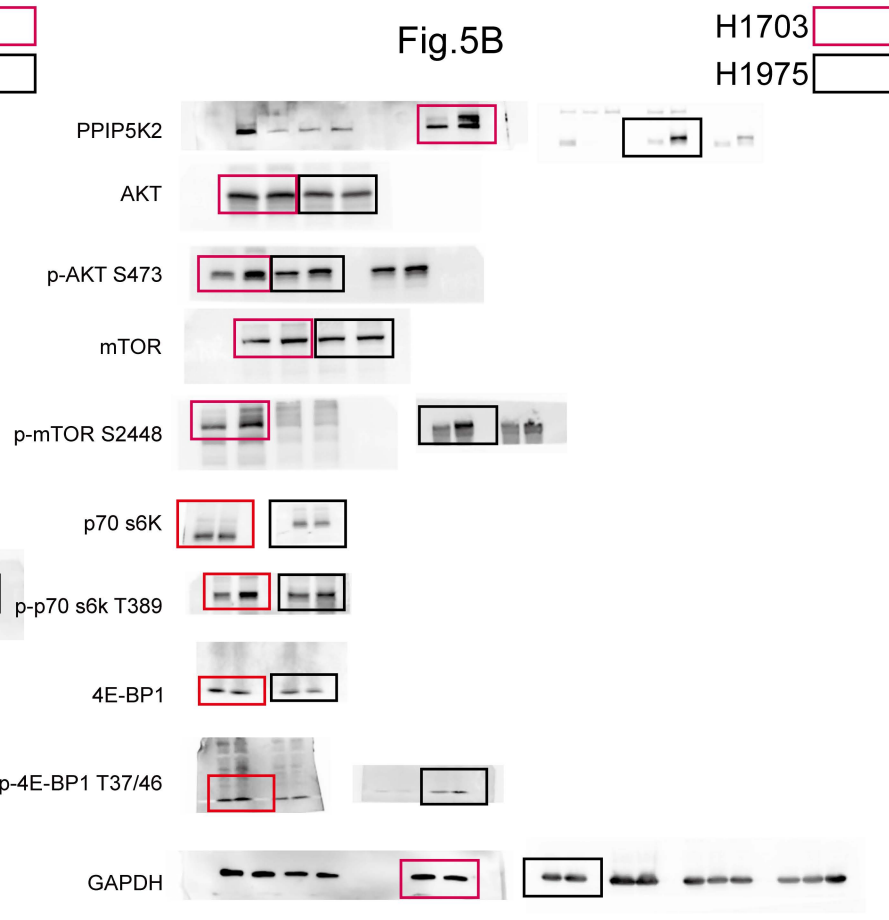H1703 ☐H1975 ☐

Supplement: s1 [file s1]
